# Supplementary material
Source: ML conference proceedings conference paper supplement (https://proceedings.mlr.press/v164/peng22a.html)
Supplement: Supplementary file 1 [file peng22a-supp.zip]

Archive with 2 entries (2 files):
- EGPO Camera-ready Appendix.pdf
- __MACOSX/._EGPO Camera-ready Appendix.pdf
